# Supplementary material
Source: Springer Nature journal article supplement (http://www.springermedizin.de/resource/supplementary/12891_2007_325_MOESM2_ESM.pdf/9511056)

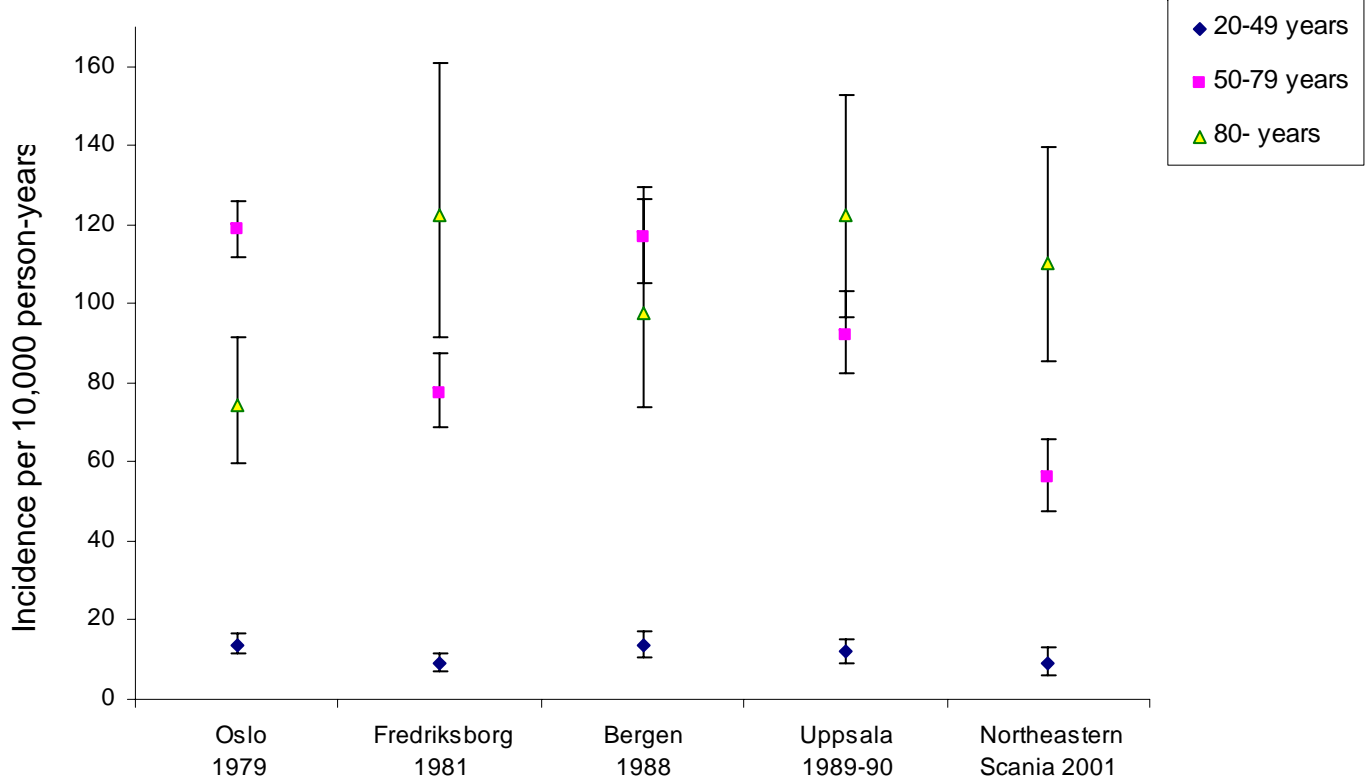

Supplement: MOESM2 [file 9511056]
